# Supplementary material for: Low temperature upregulating HSP70 expression to mitigate the paclitaxel-induced damages in NHEK cell
Source: PeerJ. 2023 Jan 17;11:e14630. doi: 10.7717/peerj.14630 (PMC9854382; doi:10.7717/peerj.14630)
Supplement: Supplemental Information 5 [file peerj-11-14630-s005.xlsx]

## Sheet: Sheet1
Fig1
		37℃				32℃				27℃				22℃									T	0.6	0.7	0.8	0.9	1
	0.01	1.1056	1.0534	0.9798		1.1086	0.9948	1.1128		1.1403	1.0323	1.0823		1.0202	1.1413	1.1261							10	1.26276	0.85041	0.56672	0.3596	0.20173
	0.05	0.8742	0.9142	0.9242		0.97047	0.97152	1.0292		1.00963	1.02713	1.05274		1.07914	1.06368	1.00132							11	1.1461	0.77183	0.51026	0.31715	0.16872
	0.1	0.7225	0.7975	0.8093		0.87645	0.95532	0.88647		0.91926	0.94231	1.05102		0.9575	1.02995	0.9975							12	1.07824	0.72538	0.47656	0.29169	0.14891
	0.5	0.3698	0.4127	0.4202		0.61956	0.52751	0.52982		0.66992	0.65313	0.69365		0.76012	0.75781	0.68762							13	1.03596	0.69614	0.45528	0.27563	0.1365
	1	0.2293	0.2514	0.3499		0.42886	0.36824	0.39926		0.5108	0.4519	0.5433		0.52914	0.58861	0.56014							14	1.00749	0.67633	0.44088	0.26488	0.12835
	5	0.1012	0.1658	0.1577		0.1987	0.1589	0.1782		0.19805	0.21014	0.23962		0.2197	0.2532	0.2628							15	0.98636	0.66158	0.43024	0.25709	0.12263
	10	0.098	0.151	0.114		0.12097	0.13771	0.16531		0.15963	0.16382	0.16491		0.13992	0.19585	0.19894							16	0.96879	0.64933	0.42152	0.25088	0.11828
																							17	0.95248	0.63798	0.41357	0.24539	0.11465
																							18	0.93591	0.62652	0.40566	0.24009	0.11135
Fig3											(c)
	(a)
											Con37℃	156.43	174.12	162.39
	control	81.263	82.522	106.351							Con22℃	176.12	180.36	190.81
	37paclitaxel	112.352	92.276	91.758							37℃Paclitaxel	276.51	275.85	285.44
	22℃1h	158.348	166.269	193.751							22℃Paclitaxel	226.31	225.87	238.39
	22℃2h	254.298	265.142	291.692
	22℃24h	122.793	125.638	148.965						(b)
											CCCP	103.23	91.33	91.15
											Con	16.25	25.37	16.88
											37℃	45.75	60.68	60.35
											22℃	36.32	34.84	27.33
Fig5											Fig4	（a)				(b)
	T	40	60	80	100	120					37paclitaxel	39.6	38.9	42.4		37	94.8	94.2	83.1
	10	0.93493	0.91595	0.89769	0.88011	0.86318					22paclitaxel	81.6	84.8	85.3		37+TRC	133.2	133.3	120.3
	11	0.91063	0.87638	0.84827	0.82401	0.80221					37paclitaxel+TRC	79.5	82.4	78.7		22	140.4	139.3	120.3
	12	0.89543	0.86663	0.84175	0.81935	0.79854					22paclitaxel+KNK	46.2	46.1	43.1		22+KNK	93.2	93.1	109.7
	13	0.88574	0.86018	0.83717	0.81578	0.79542
	14	0.87936	0.85569	0.83371	0.81279	0.79251
	15	0.87497	0.85235	0.83085	0.81003	0.78957
	16	0.87175	0.84964	0.82827	0.8073	0.78644
	17	0.8692	0.84724	0.82574	0.80441	0.78297
	18	0.86702	0.84496	0.82312	0.80124	0.77903
	19	0.86499	0.84263	0.82029	0.79767	0.77449
	20	0.86298	0.84016	0.81712	0.79359	0.76922
	21	0.8609	0.83744	0.81353	0.78886	0.76304
	22	0.85867	0.83439	0.8094	0.78334	0.75579
	23	0.85622	0.83092	0.80461	0.77687	0.74727
	24	0.85348	0.82693	0.79901	0.76928	0.73725
	25	0.85038	0.8223	0.79246	0.76035	0.72547
	26	0.84683	0.81691	0.78475	0.74984	0.71168
	27	0.84273	0.81059	0.7757	0.73752	0.6956
	28	0.83798	0.80317	0.76505	0.72309	0.67692
	29	0.83243	0.79445	0.75255	0.70627	0.6554
	30	0.82593	0.7842	0.73793	0.68678	0.63079
	31	0.8183	0.77217	0.72088	0.66434	0.60294
	32	0.80933	0.75807	0.70112	0.63873	0.57177
